# Supplementary material for: Regional physically based landslide early warning modelling: soil parameterisation and validation of the results
Source: Copernicus journal article supplement (doi:10.5194/nhess-2017-425), 2018-01-02
Supplement: Supplementary file [file nhess-2017-425-RC3-supplement.zip]

# Résumé des commentaires sur nhess-2017-425\_reviewer03.pdf

---

Page : 1

---

 Auteur : Sujet : Texte surligné      Date : 28/01/2018 17:06:43  
please, simplify the text. one sentence is sufficient

---

 Auteur : Sujet : Texte surligné      Date : 28/01/2018 17:11:09  
I think you can start the sentence by another term like : it is possible to define reliable alert levels by statistical analysis of failure probability.

---

## Page : 2

- 
-  Auteur : Sujet : Texte surligné      Date : 28/01/2018 17:13:45  
simplify the text please, the sentence is hard to understand in one read
- 
-  Auteur : Sujet : Texte surligné      Date : 04/02/2018 18:01:18
- 
-  Auteur : Sujet : Texte surligné      Date : 28/01/2018 17:14:41  
for shallow landslide ? for deep landslide? please re-precise
- 
-  Auteur : Sujet : Texte surligné      Date : 28/01/2018 17:16:18  
I think you can simplify the tex by one sentence. You hav etoo barrative sentence, please go to the subject straightaway
- 
-  Auteur : Sujet : Texte surligné      Date : 28/01/2018 17:18:38  
Which context do you speak ? vegetation mitigation is not always used by geotechnical office. in lot of cases the solution are not based on vegetation solutions reinforcement, wall, etc....). please revise this part of the text.
- 
-  Auteur : Sujet : Texte surligné      Date : 28/01/2018 17:20:19  
ok, but it is a specific case. you srudy site is in this context ? if not maybe you can improve your introduction by giving the different context of vegetation solution and related context they are used.
- 
-  Auteur : Sujet : Texte surligné      Date : 28/01/2018 17:22:40  
ok, but please put transition sentence. waht is the relation between the text about root reinforcement and he used of HIRESS ? where is the problematic in this introduction ?

---

 Auteur : Sujet : Note      Date : 28/01/2018 17:23:54  
there is a lack of one problematic in the introduction. Please revise it.

---

 Auteur : Sujet : Texte surligné      Date : 28/01/2018 17:25:50  
ok, but what do you mean by high climatic variations ? rainfall? others ? please give some information

---

 Auteur : Sujet : Note      Date : 28/01/2018 17:29:51  
In a geographical description, the best is to start with geological settings which give the structure of the landscape, after the georphological processes are given in order to explain the landscape formation since the last glaciation. please revise your text.

---

 Auteur : Sujet : Texte surligné      Date : 28/01/2018 17:32:17  
for landslides have you some references ? how do you know the processes, their typology etc...  
moreover more explanations about shallow landslides (this is the object of the early warning system you propose) should be welcome.  
please detail landslides phenomenon.

---

 Auteur : Sujet : Note      Date : 28/01/2018 17:36:37

---

I don't understand how you have structured the text. I think you have to give the detail of each formations before, which formation have been investigated ?

 Auteur : Sujet : Texte surligné      Date : 28/01/2018 17:40:17

---

You chose the slope deposits point to investigate by analysis of DTM ?

I am very surprised, for me the field survey, observations is the first way to chose good locations.

Have you make a dteail geomorphological analysis of the study sites ? This is the first step to conduct a slope instability analysis.

 Auteur : Sujet : Texte surligné      Date : 28/01/2018 17:42:05

---

you can simplify. Please make one reference about the protocol. if the reader wants more information, he can read the protocol on another paper.

---

 Auteur : Sujet : Texte surligné      Date : 28/01/2018 17:45:12  
you have to reduce this part, lot of thing can be read in litterature. Simplify the text.

---

 Auteur : Sujet : Texte surligné      Date : 04/02/2018 18:02:40

---



---

 Auteur : Sujet : Texte surligné Date : 04/02/2018 18:00:48

the approach is not new, Mergili et al., 2014 or Thiery et al., 2017 with r. slope. stability or ALICE tool used this approach to integrate the uncertainty of environmeent (geotechnical values). You have to mention these references in your text.

doi:10.1016/j.geomorph.2013.10.008

Thiery et al.

Thiery, Y., Vandromme, R., Maquaire, O., Berneradie, S., 2017. HYPERLINK "[http://link.springer.com/chapter/10.1007/978-3-319-53498-5\\_104](http://link.springer.com/chapter/10.1007/978-3-319-53498-5_104)" Landslide susceptibility assessment by EPBM (Expert physically based model): strategy of calibration in complex environment. In: Mikoš, M., Tiwari, B., Yin, Y., Sassa, K. (Eds) Advancing Culture of Living with Landslides. Proceedings, Vol. 2: Advances in Landslide Science, Springer, 4th World Landslide Forum in Ljubljana, pp.917-926. [https://doi.org/10.1007/978-3-319-53498-5\\_104](https://doi.org/10.1007/978-3-319-53498-5_104)

you can mention the last paper with TRIGRS :<https://doi.org/10.1007/s10346-017-0931-7>

 Auteur : Sujet : Note Date : 28/01/2018 18:01:15

---

I think you have a problem of structure in your text. I think it is better to present

1. study sites
- 2 Model, improvement and the strategy used (calibration etc)
- 3 data used or created for your study
- 4 results

The text will be more clear and understandable

 Auteur : Sujet : Texte surligné Date : 28/01/2018 18:03:21

---

this sentence has to be in another part linked to the problematic of environmental lack of data or problems.



---

Auteur : Sujet : Note Date : 04/02/2018 18:01:50

the discussion is poor, the main goal of a discussion is to criticize results, methodology and have an objective vision of the research.

I think the discussion has to be improved by authors.

I don't see the real contribution of the study. Hard work was made , but the text not reflect this work. You have to improve your text.
